# Supplementary material for: Examining Sex Differences in Autism Heritability
Source: PubMed Central journal article supplement (PMC11024771; doi:10.1001/jamapsychiatry.2024.0525), 2024-04-17
Supplement: jamapsychiatry-e240525-s002.pdf [file jamapsychiatry-e240525-s002.pdf]

## Data Sharing Statement

Sandin. Examining Sex Differences in Autism Heritability. *JAMA Psychiatry*. Published April 17, 2024. doi:10.1001/jamapsychiatry.2024.0525

### Data

**Data available:** No
